# Supplementary material
Source: publisher site journal article supplement (https://www.spandidos-publications.com/5862/downloadSupplementary)
Supplement: Supplementary file 1 [file downloadSupplementary]

## Data S1. Search strategies.

### *Search strategies for PubMed.*

((breast neoplasms OR (breast AND neoplasms) OR breast neoplasms OR (breast AND cancer) OR breast cancer) OR (breast neoplasms OR (breast AND neoplasms) OR breast neoplasms OR (breast AND carcinoma) OR breast carcinoma)) AND ((dose AND dense) OR (dose AND intense ) OR (every AND 14 AND days) OR (every AND week) OR (every AND 2 AND weeks)) AND ((neoadjuvant therapy OR (neoadjuvant AND therapy) OR neoadjuvant therapy OR neoadjuvant) OR preoperative OR (induction AND primary)) AND (drug therapy OR (drug AND therapy) OR drug therapy OR chemotherapy OR drug therapy OR (drug AND therapy) OR chemotherapy)

### *Search strategies for EMBase.*

#1 breast cancer dose intense.mp[mp=tx, bt, ti, ot, ab, kw, sh, ct, fx,hw, tn, dm, mf, dv, kf, dq, sw, nm, ox, px, rx, an, ui, ds, on, sy, ux,mx, tc, id, tm]

#2 breast neoplasms dosedense.mp. [mp=tx, bt, ti, ot, ab,kw, sh, ct, fx, hw, tn, dm, mf, dv, kf,dq, sw, nm, ox, px, rx, an, ui, ds,on, sy, ux, mx, tc, id, tm]

#3 #1 and #2

### *Search strategies for Cochrane library.*

#1. dose intense, breast cancer

#2. MeSH descriptor
